# Supplementary material for: Genome-Wide DNA Methylation and Transcriptome Analyses Reveal Epigenetic and Genetic Mechanisms Underlying Sex Maintenance of Adult Chinese Alligator
Source: Front Genet. 2021 Mar 11;12:655900. doi: 10.3389/fgene.2021.655900 (PMC7990765; doi:10.3389/fgene.2021.655900)
Supplement: Supplementary Table 1 — Expression patterns of genes involved in sex maintenance and gonadal function development. [file Table_1.XLSX]

## Sheet: Sheet1
Table S1
Pathway	GeneID	Gene Name	Full Gene Name	SF_OVA	SM_TES	WF_OVA	WM_TES	Biased_Summer	Q_value_Summer	Biased_Winter	Q_value_Winter
Oocyte meiosis pathway	Alsi27471	MOS	Oocyte maturation factor	15.1807	0.119084	26.6071	0.209915	Female	0.00011159	Female	2.2985e-07
	Alsi09737	MEK1	Mitogen-activated protein kinase kinase 1	55.2742	24.7745	87.6847	18.7404	Female	7.0431e-09	Female	1.4288e-32
	Alsi19197	ERK(MAPK1_3)	Mitogen-activated protein kinase 1	119.324	42.3525	100.707	32.5606	Female	1.4258e-07	Female	2.6196e-07
	Alsi13812	RSK(RPS6KA)	Ribosomal protein S6 kinase 2 alpha	38.3248	8.11264	61.9552	6.2565	Female	9.6324e-16	Female	9.7947e-37
	Alsi06466	Myt1	Membrane-associated tyrosine- and threonine-specific cdc2-inhibitory kinase	3.04059	15.1678	3.3399	14.1849	Male	3.491e-05	Male	0.00017716
	Alsi23916	BUBL1	Mitotic checkpoint serine/threonine-protein kinase BUBL1	2.93207	14.7156	5.63747	9.29432	Male	9.702e-24	/	0.001551
	Alsi17513	MAD1L	Mitotic spindle assembly checkpoint protein MAD1L	24.762	8.00434	37.2287	16.77	Female	2.0475e-07	Female	1.0492e-06
	Alsi00562	CDH1	Cell division cycle 20-like protein 1	3.60525	24.3738	6.36766	9.37468	Male	9.8855e-51	/	0.0081793
	Alsi20521	APC5	Anaphase-promoting complex subunit 5	14.7534	73.6854	24.9439	69.1055	Male	7.1329e-22	Male	1.415e-11
	Alsi23724	CDC20	Cell division cycle protein 20 homolog	66.3149	187.435	128.898	82.065	Male	4.3682e-17	/	0.00063539
	Alsi02207	PLK1	Serine/threonine-protein kinase	32.7579	74.0565	49.1932	36.8602	Male	1.6253e-07	/	0.080482
	Alsi26954	EMI2 (EMXO43)	F-box only protein 43	14.8442	7.10941	25.793	10.9845	/	0.0052383	Female	2.7356e-05
	Alsi11825	CCNE2	G1/S-specific cyclin-E2	55.1179	21.6809	72.0088	31.6647	Female	5.4221e-05	Female	2.7712e-05
	Alsi07936	CCCE1	G1/S-specific cyclin-E1	87.4391	2.3157	161.164	1.2246	Female	6.7048e-23	Female	6.342e-40
	Alsi00930	CDK2	Cyclin-dependent kinase 2	20.0978	37.871	36.6881	41.4553	/	0.035962	/	0.43054
	Alsi04090	CDC25A	M-phase inducer phosphatase 1	38.187	8.47882	62.7858	9.31773	Female	4.4746e-07	Female	5.7055e-14
	Alsi05499	CDC25B	M-phase inducer phosphatase 2	23.7418	3.40131	41.6843	2.66474	Female	3.9159e-07	Female	3.1588e-15
	Alsi02364	CDC25C	M-phase inducer phosphatase 1-B	30.6757	46.1604	58.0601	32.8232	/	0.09543	/	0.01309
	Alsi20254	CYCB3	G2/mitotic-specific cyclin-B3	37.172	32.2195	68.727	25.4859	/	0.37403	Female	8.8171e-08
	Alsi07181	CYCB1	G2/mitotic-specific cyclin-B1	81.2494	116.39	157.313	64.1527	/	0.00039835	Female	2.1542e-20
	Alsi21664	CDK1	Cyclin-dependent kinase 1	6.95867	13.7202	8.77611	5.44657	/	0.00021	/	0.027315
	Alsi22045	ITPR2-1	Inositol 1,4,5-trisphosphate receptor type 2	8.99334	11.7881	5.41612	3.89946	/	0.17917	/	0.23929
	Alsi26015	CPEB1	Cytoplasmic polyadenylation element-binding protein 1	95.6872	57.5288	86.2263	183.71	/	1.7452e-15	Male	3.8985e-55
	Alsi14307	CPEB2	Cytoplasmic polyadenylation element-binding protein 2	9.67972	6.74122	11.5052	6.0995	/	0.20269	/	0.030907
	Alsi27137	ITPR1	Inositol 1,4,5-trisphosphate receptor type 1	23.7289	10.5307	27.9983	3.90398	Female	6.663e-12	Female	3.9326e-43
	Alsi25322	ITPR3	Inositol 1,4,5-trisphosphate receptor type 3	3.33489	13.9594	2.45142	16.4047	Male	5.0156e-14	Male	3.1946e-22
	Alsi02168	AURKA	Aurora kinase A	66.0877	66.0052	126.632	173.039	/	0.58416	/	0.0044318
	Alsi05669	YWHAG_H	14-3-3 protein gamma	100.401	41.6922	103.319	42.1385	Female	0.00027998	Female	0.00016925
	Alsi17591	YWHAG_H	14-3-3 protein eta	249.438	97.1477	176.736	56.0731	Female	7.5994e-11	Female	2.5019e-10
	Alsi09906	RBX1	E3 ubiquitin-protein ligase EBX1	123.395	238.219	132.908	298.967	/	0.00027537	Male	1.0211e-06
	Alsi22052	ITPR2-2	Inositol 1,4,5-trisphosphate receptor type 2	0.526739	0.721807	0.255	0.177678	/	0.025096	/	0.11403
	Alsi05189	SMC1	Structural maintenance of chromosomes protein 1A	23.993	32.2649	23.7011	39.051	/	0.00027104	/	5.7655e-11
	Alsi10642	APC12	Anaphase-promoting complex subunit CDC26	90.5203	56.5507	97.1293	97.6622	/	0.16216	/	0.55925
	Alsi11431	ADCY4	Adenylate cyclase type 4	11.0625	0.776199	3.33953	1.57348	Female	2.9236e-08	/	0.14692
	Alsi18467	MAD2	Mitotic spindle assembly checkpoint protein MAD2A	51.8356	77.5095	88.3891	76.1837	/	0.088578	/	0.35055
	Alsi19001	CAMK2	Calcium/calmodulin-dependent protein kinase type II subunit delta	24.3097	65.9327	14.654	22.7683	Male	2.6701e-08	/	0.091614
	Alsi20767	ADCY3	Adenylate cyclase type 3	5.311	1.19521	3.77325	1.74569	Female	0.0025356	/	0.10145
	Alsi26352	ADCY7	Adenylate cyclase type 7	3.13051	1.90381	1.9348	1.1815	/	0.18525	/	0.25722
	Alsi08912	PGR	Progesterone receptor	44.5096	1.51994	31.1577	2.74307	Female	1.0464e-12	Female	7.3065e-08
	Alsi25179	YWHAB_Q_Z	14-3-3 protein theta	804.055	1004.62	808.323	383.737	/	0.0002132	Female	8.4266e-24
	Alsi01232	APC13	Anaphase-promoting complex subunit 13	111.684	113.413	152.859	156.529	/	0.57691	/	0.5459
	Alsi02366	APC8	Anaphase-promoting complex subunit 8	31.6831	17.095	61.1462	47.3539	/	0.0011887	/	0.038256
	Alsi03183	PPP2R5	Serine/threonine-protein phosphatase 2A 56 kDa regulatory subunit delta isoform	29.4989	18.4441	37.5166	21.1201	/	0.03302	/	0.003955
	Alsi04473	CALM	Calmodulin	858.94	2504.91	605.77	2713.36	Male	3.8087e-77	Male	1.2811e-131
	Alsi06036	APC6	Anaphase-promoting complex subunit 6	25.2703	35.5307	35.9803	43.9014	/	0.006563	/	0.060901
	Alsi06894	FBXW11	F-box/WD repeat-containing protein 11	43.4471	36.1293	63.789	19.6381	/	0.28391	Female	6.6738e-09
	Alsi09425	YWHAE	14-3-3 protein epsilon	355.228	670.777	212.848	464.734	/	5.5012e-15	Male	1.4609e-14
	Alsi14434	PLCZ	1-phosphatidylinositol 4,5-bisphosphate phosphodiesterase zeta-1	0.528155	65.5075	0.628308	3.61779	Male	4.0233e-194	Male	1.3879e-07
	Alsi20312	SLK	STE20-like serine/threonine-protein kinase	24.0191	26.9498	17.9174	29.2819	/	0.27685	/	8.3684e-05
	Alsi21166	SGOL1	Shugoshin-like 1	6.86269	22.1739	10.4062	54.6939	Male	5.8532e-05	Male	6.1311e-16
	Alsi14334	PTTG1	Securin	385.628	288.578	622.336	201.906	/	0.011522	Female	6.9662e-26
	Alsi06667	ESP1	Separin	8.22823	4.72493	17.8302	4.83466	/	4.1397e-06	Female	2.4437e-42
	Alsi03832	REC8L	Meiotic recombination protein REC8 homolog	5.68792	24.8958	8.24626	11.3354	Male	1.445e-07	/	0.24833
	Alsi18744	STAG3	Cohesin subunit SA-3	3.96787	52.9707	7.60883	47.3373	Male	7.6753e-38	Male	6.4793e-25
	Alsi24095	SMC1B	Structural maintenance of chromosomes protein 1B	2.9291	156.423	5.34028	148.677	Male	5.8045e-212	Male	4.3923e-195
	Alsi01731	SKP1 /SCF	S-phase kinase-associated protein 1	439.659	1104.85	602.976	650.541	Male	2.2482e-32	/	0.28715
	Alsi18870	SMC3	Structural maintenance of chromosomes protein 3	36.0371	93.0774	50.5884	153.587	Male	6.4966e-34	Male	1.4933e-69
Steroid hormone biosynthesis pathway	Alsi27290	StAR	Steroidogenic acute regulatory protein, mitochondrial	49.5839	99.8515	48.7475	50.8256	Male	0.00026256	/	0.5219
	Alsi01422	CYP11A	Cholesterol side-chain cleavage enzyme, mitochondrial	2.9556	45.2271	9.49938	0.719532	Male	2.9356e-15	Female	0.00052735
	Alsi20333	CYP17A	Steroid 17-alpha-hydroxylase/17,20 lyase	6.93682	429.613	6.1686	20.7911	Male	1.1216e-179	Male	0.00025165
	Alsi15846	HSD3B	3 beta-hydroxysteroid dehydrogenase/Delta 5-->4-isomerase	1.93321	168.52	1.43652	19.1579	Male	2.2888e-52	Male	4.1277e-06
	Alsi23121	HSD17B1	Estradiol 17-beta-dehydrogenase 1	27.0021	19.4164	5.17795	7.3846	/	0.26686	/	0.40573
	Alsi02770	HSD17B2A	Estradiol 17-beta-dehydrogenase 2	3.47605	0.627872	5.96405	0	/	0.21305	/	NA
	Alsi02771	HSD17B2B	Estradiol 17-beta-dehydrogenase 2	0.577378	0.2613	0.851682	0.0511786	/	0.37595	/	0.068003
	Alsi20150	SF1(Nr6a1)	Nuclear receptor subfamily 6 group A member 1	2.47607	6.07245	1.94477	3.8105	Male	4.4663e-05	/	0.010425
	Alsi10378	Cbx2	Chromobox protein homolog 2	2.3886	0.630578	5.63742	0.846897	/	0.21271	/	0.025962
	Alsi15424	CYP3A	Cytochrome P450 3A24	29.8776	7.64258	7.70373	1.71865	Female	4.2645e-09	Female	0.0017828
	Alsi19455	CYP2G	Cytochrome P450 2G1	8.61031	33.1062	3.4818	4.97704	Male	3.8758e-114	/	0.0042949
	Alsi11309	SULT2B1	Sulfotransferase family cytosolic 2B member 1	26.4558	3.3614	13.2189	2.06098	Female	8.373e-05	/	0.0084114
	Alsi08251	HSD17B4A	Peroxisomal multifunctional enzyme type 2	0.269793	53.9674	0	0.621773	Male	1.519e-06	/	NA
	Alsi15752	HSD17B4B	Peroxisomal multifunctional enzyme type 2	27.1508	77.5842	24.0042	21.9991	Male	4.8221e-14	/	0.44666
	Alsi00944	HSD17B6A	17-beta-hydroxysteroid dehydrogenase type 6	1.80297	1.26279	3.27217	0.519396	/	0.51451	/	0.13964
	Alsi00945	HSD17B6B	17-beta-hydroxysteroid dehydrogenase type 6	0	0.0657206	0.128526	0	/	NA	/	NA
	Alsi00946	HSD17B6C	17-beta-hydroxysteroid dehydrogenase type 6	0	0	0	0	/	NA	/	NA
	Alsi00947	HSD17B6D	17-beta-hydroxysteroid dehydrogenase type 6	0	0.0900826	0	0	/	NA	/	NA
	Alsi11168	HSD17B6E	17-beta-hydroxysteroid dehydrogenase type 6	0.819756	10.2486	0.982482	0.472308	/	0.10258	/	0.51212
	Alsi11172	HSD17B6F	17-beta-hydroxysteroid dehydrogenase type 6	0	0	0	0	/	NA	/	NA
	Alsi05190	HSD17B10	3-hydroxyacyl-CoA dehydrogenase type-2	79.2117	74.7886	76.9664	27.8535	/	0.51166	Female	3.8307e-05
	Alsi08236	HSD17B12	Very-long-chain 3-oxoacyl-CoA reductase	6.19978	5.62553	11.0015	2.98559	/	0.55517	/	0.075302
Female determination/differentiation pathway	Alsi04067	FOXL2	Forkhead box L2	1.67385	0	2.35384	0.128586	/	NA	/	0.22235
	Alsi11157	CYP19A	Aromatase	3.32161	0.0452363	0.0884659	0	/	0.035822	/	NA
	Alsi04981	GDF9	Growth/differentiation factor 9	287.361	0.208992	575.774	0.0614	Female	2.5015e-53	Female	3.2013e-65
	Alsi02440	ERα1	Estrogen receptor alpha	3.78294	0.904725	0.707727	0.212641	/	0.23815	/	0.45154
	Alsi02441	ERα2	Estrogen receptor alpha	6.18427	2.274	1.05884	0.127254	/	0.27017	/	0.36943
	Alsi05459	ERβ	Estrogen receptor beta	1.27083	0.569653	1.70587	0	/	0.38729	/	NA
	Alsi03177	WNT4A	Wingless-Related MMTV Integration Site 4A	0	0	0.0588923	0	/	NA	/	NA
	Alsi17834	WNT4B	Wingless-Related MMTV Integration Site 4B	9.30696	1.67193	2.79287	0.573067	/	0.031311	/	0.21098
	Alsi06967	Rspo1	R-spondin-1	4.15549	0.0657206	1.47805	0.308931	/	0.050023	/	0.30445
	Alsi19270	FST	Follistatin	3.97911	24.8827	1.4157	4.03726	Male	2.9689e-10	/	0.075845
	Alsi15079	WNT5A	Wingless-Related MMTV Integration Site 5A	81.3693	5.44249	85.6806	4.02938	Female	4.0534e-20	Female	1.7981e-22
	Alsi18186	EMX2	Homeobox protein EMX2	33.3326	3.29987	57.9266	6.09384	Female	0.0016236	Female	3.3379e-05
	Alsi16145	WT1	Wilms tumor protein 1	133.415	12.4296	95.4017	27.1357	Female	2.2434e-91	Female	1.5654e-32
	Alsi14127	LHX9	LIM/homeobox protein Lhx9	5.49656	0.313828	10.6203	0.0801742	Female	2.09e-06	Female	6.308e-12
	Alsi09690	FOG2	Zinc finger protein ZFPM2	0.156679	0.0303772	0.119497	0.0139511	Female	0.00010972	Female	9.3604e-05
	Alsi04737	VNN1	Pantetheinase	9.48253	3.38029	13.9186	1.8284	Female	1.7515e-05	Female	3.9641e-16
	Alsi19126	HES1	Transcription factor HES-1	38.4226	4.97599	100.51	26.732	Female	1.458e-06	Female	1.0923e-09
	Alsi00588	BMP2A	Bone morphogenetic protein 2A	15.8613	0.054003	42.033	0	Female	7.8578e-05	Female	3.5951e-12
	Alsi05542	BMP2B	Bone morphogenetic protein 2B	35.8601	4.89921	51.8471	4.51846	Female	8.5861e-07	Female	5.8237e-11
	Alsi07458	BMP2C	Bone morphogenetic protein 2C	0.19796	0.0647033	0.126536	0.304149	/	0.5269	/	0.50238
	Alsi12452	FGFR2	Fibroblast growth factor receptor 2	19.6065	3.32256	8.48178	3.48728	Female	7.7768e-08	/	0.028023
	Alsi01197	PDGF-A	Platelet-derived growth factor subunit A	42.4444	12.1986	40.5204	13.9138	Female	0.00091079	Female	0.0035407
	Alsi04812	PDGFRA	Platelet-derived growth factor receptor alpha	13.6425	5.79108	6.7074	2.33546	Female	0.0036083	/	0.015779
	Alsi18631	PDGFRB	Platelet-derived growth factor receptor beta	12.4137	0.889729	8.99612	1.13457	Female	2.7269e-09	Female	5.5605e-06
	Alsi08441	TGFβ2A	Transforming growth factor beta-2	32.6809	4.87647	42.5433	2.23273	Female	5.8816e-06	Female	4.4839e-10
	Alsi08442	TGFβ2B	Transforming growth factor beta-2	5.54739	1.00201	6.29865	0.336439	/	0.21305	/	0.10488
	Alsi09259	TGFBR3	Transforming growth factor beta receptor type 3	65.5556	15.4673	60.4018	12.509	Female	1.9741e-19	Female	7.9259e-20
	Alsi24586	GATA2	GATA-binding factor 2	4.95839	0.725665	8.44389	1.96139	/	0.095422	/	0.061994
	Alsi16947	CTNNB1	Catenin beta-1	23.6446	7.16439	22.2253	12.9976	Female	1.4162e-42	/	5.5771e-12
Female fertility genes	Alsi04020	GPR54	G-protein coupled receptor 54	0.464603	0.0569459	0.334097	0.133842	/	0.41018	/	0.48987
	Alsi09629	MTR1C	Melatonin receptor type 1C	0.679566	0.121155	2.42858	0.213565	/	0.39724	/	0.13897
	Alsi04546	KiSS-1	Metastasis-suppressor KiSS-1	6.0281	1.46364	3.77061	1.05848	Female	0.00058638	/	0.011054
	Alsi26176	BNC2A	Zinc finger protein basonuclin-2	10.9109	8.33868	14.5383	3.42053	/	0.44487	/	0.021069
	Alsi04466	FSHR1	Follicle-stimulating hormone receptor	9.63606	7.68705	6.57698	6.49288	/	0.47832	/	0.55906
	Alsi14668	ADAMTS1	A disintegrin and metalloproteinase with thrombospondin motifs 1	267.752	7.37472	17.9311	9.72804	Female	0	/	0.00080331
	Alsi17213	RIP140（NRIP1）	Nuclear receptor-interacting protein 1	43.4703	48.2316	36.2148	10.8757	/	0.30718	Female	8.1209e-12
	Alsi08086	PRLRB	Prolactin receptor	32.5231	19.2995	57.6739	33.3531	/	0.053697	/	0.0074001
	Alsi17022	RBP4	Retinol-binding protein 4	19.0765	14.8517	7.73945	13.6909	/	0.26566	/	0.068787
	Alsi18184	nanos1	nanos C2HC-type zinc finger 1	30.2699	1.11166	61.4156	0.653192	Female	6.0931e-05	Female	5.2972e-09
	Alsi04467	FSHR2	Follicle stimulating hormone receptor 2	10.8868	11.6148	2.57283	5.25655	/	0.54283	/	0.1958
	Alsi07542	FSH-β	Follicle stimulating hormone beta subunit	0	0	0	0	/	NA	/	NA
	Alsi09727	GnRHR2A	Gonadotropin-releasing hormone receptor 2A	0.225203	0	0.263909	0.00961128	/	NA	/	0.14532
	Alsi15583	GnRHR2B	Gonadotropin-releasing hormone receptor 2B	0.379472	0.496122	0.12128	0.874541	/	0.55912	/	0.33272
	Alsi22688	GnRHR2C	Gonadotropin-releasing hormone receptor 2C	0.0906535	0.0148151	0.0144865	0.0696409	/	0.45131	/	0.46165
	Alsi18123	BMPR-1B	Bone morphogenetic protein receptor type-1B	8.80526	12.0634	17.4768	5.35769	/	0.31991	Female	0.0021427
	Alsi18221	MTNR1A2	Melatonin receptor type 1A	0.975135	16.8013	1.40245	1.0434	Male	0.00024296	/	0.51522
	Alsi18354	PRLR	Prolactin receptor	2.17682	6.33308	0.619262	1.18528	/	0.025261	/	0.36849
	Alsi19825	MTNR1B	Melatonin receptor type 1B	8.02127	0.224722	17.9086	0.264086	/	0.039003	Female	0.0018648
	Alsi20255	BMP15	Bone morphogenetic protein 15	7.48418	0.106357	6.81188	0.124987	Female	0.0037127	/	0.0052123
	Alsi22940	BMP6	Bone morphogenetic protein 6	19.2057	5.51187	9.13241	3.50857	/	0.016123	/	0.14513
	Alsi26177	Basonuclin-2B	Zinc finger protein basonuclin-2	14.8842	7.21856	4.59262	2.33376	/	0.028817	/	0.20385
Male determination/differentiation pathway	Alsi12948	DMRT1	Doublesex and mab-3 related transcription factor 1	1.68979	107.66	3.40038	124.138	Male	6.1893e-78	Male	8.967e-89
	Alsi12198	SOX9	SRY (sex determining region Y)-box 9	0.430579	8.233	3.59172	1.14117	Male	0.001002	/	0.15675
	Alsi09101	AMH	Anti-Mullerian hormone	2.89212	48.364	0.542539	12.8596	Male	1.4352e-21	Male	6.9638e-07
	Alsi25321	FGF9	Fibroblast growth factor 9	0.110433	92.9092	0.105884	103.712	Male	4.1051e-10	Male	7.7134e-11
	Alsi09917	PDGFB	Platelet-derived growth factor subunit B	13.2618	11.1462	5.99445	1.30987	/	0.50056	/	0.14003
	Alsi09175	PDGF2	Platelet-derived growth factor	9.31272	28.7128	8.19266	11.5056	/	0.013593	/	0.39764
	Alsi15507	DAX1(NR0B2)	Nuclear receptor subfamily 0 group B member 2	0.140221	0.893714	0.26889	2.10053	/	0.36958	/	0.20892
	Alsi21317	FGFRL1	Fibroblast growth factor receptor-like 1	11.2747	1.24499	5.11297	0.936363	Female	0.00143	/	0.055318
	Alsi10845	PTCH1	Protein patched homolog 1	0.959114	3.00052	2.91938	4.57869	/	0.042082	/	0.19698
	Alsi27297	FGFR1	Fibroblast growth factor receptor 1	28.4058	14.1755	7.45272	21.351	/	1.799e-06	Male	7.7499e-09
	Alsi02672	PDGF1	Platelet-derived growth factor 1	0.987385	0.113717	0.116786	0.0754039	Female	1.1574e-17	/	0.2875
	Alsi03750	SOX8	SRY (sex determining region Y)-box 8	3.1754	1.03788	7.0579	6.76371	/	0.21342	/	0.54843
	Alsi02300	SMAD4A	MAD homology 1, Dwarfin-type	36.59	22.3791	37.67	44.3767	/	0.038102	/	0.30896
	Alsi04507	SIX1	Homeobox protein SIX1	0.087351	7.96566	0	0.301967	/	0.019126	/	NA
	Alsi06201	SMAD2	Mothers against decapentaplegic homolog 2	65.2548	62.6975	35.9257	40.2605	/	0.52712	/	0.41115
	Alsi06593	SIX4	Homeobox protein SIX4	1.16341	0.547576	5.75589	3.37834	/	0.43339	/	0.29208
	Alsi03214	MAP3K1	Mitogen-activated protein kinase kinase kinase 1	14.936	31.6129	31.9232	49.3066	Male	3.9632e-12	/	7.0576e-08
	Alsi24145	AR	Androgen receptor	10.6265	13.9923	9.14072	23.5104	/	0.38631	/	0.012765
	Alsi22609	PDGFA3	platelet-derived growth factor alpha polypeptide	2.58679	0.571601	0.0698654	0.0167932	Female	0.001008	/	0.41585
	Alsi15171	GATA4	GATA-binding protein 4	29.7147	19.1703	21.082	30.8345	/	0.10584	/	0.13387
	Alsi20201	PDGF3	platelet-derived growth factor 3	23.0607	4.29485	13.2449	2.41574	Female	2.9805e-06	Female	0.00038966
	Alsi04483	SIX2	Homeobox protein SIX2	0	0	0	0.284479	/	NA	/	NA
	Alsi03065	PDGFC1	Platelet-derived growth factor C1	27.335	2.43667	5.68166	0.220269	Female	0.0001557	/	0.055792
	Alsi21532	GADD45G	Growth arrest and DNA damage-inducible protein GADD45	180.716	26.7862	398.783	39.6074	Female	1.1318e-12	Female	1.1998e-31
	Alsi02166	CBLN4	Cerebellin-4	0.405974	0	1.45969	0	/	NA	/	NA
	Alsi03066	PDGFC2	platelet derived growth factor C2	5.94323	2.21049	2.75095	2.83385	/	0.36972	/	0.55917
	Alsi04738	VNN1B	Pantetheinase	2.21644	2.91974	0.407854	1.44471	/	0.44439	/	0.17673
	Alsi07043	SOX3	SRY (sex determining region Y)-box 3	9.21455	0	20.0515	0.553985	/	0.013386	Female	8.3898e-05
	Alsi09061	HPGDS	Hematopoietic prostaglandin D synthase	0	0.891956	0	0.403379	Male	2.8516e-06	Male	0.0025997
	Alsi09946	SOX10	SRY (sex determining region Y)-box 10	0.29083	1.34439	0.199178	0.191501	/	0.26395	/	0.56016
	Alsi11147	SMAD4B	Mothers against decapentaplegic homolog 4	63.6074	36.31	76.5181	55.7833	/	0.00065569	/	0.023928
	Alsi17590	SIX1C	Homeobox protein SIX1	1.72232	5.38312	1.54815	0.868283	/	0.25698	/	0.48415
	Alsi18674	PDGFRB2	Platelet-derived growth factor receptor beta	16.7296	12.0562	27.4339	27.4915	/	0.029972	/	0.55907
	Alsi20609	PDGFA2	Platelet-derived growth factor receptor alpha	0	0	0	0.302676	/	NA	/	NA
	Alsi20694	HHAT	Protein-cysteine N-palmitoyltransferase HHAT	1.17016	0.98349	1.18206	0.914981	/	0.53761	/	0.48954
	Alsi21323	KDM3A/JMJD1A	Lysine-specific demethylase 3A	10.7896	17.1505	20.6778	27.1992	/	0.012001	/	0.045247
	Alsi21820	MAP3K4	Mitogen-activated protein kinase kinase kinase 4	10.0479	28.3273	13.978	24.3635	Male	2.6933e-11	/	0.00024143
