# Supplementary material for: Genome-Wide DNA Methylation and Transcriptome Analyses Reveal Epigenetic and Genetic Mechanisms Underlying Sex Maintenance of Adult Chinese Alligator
Source: Front Genet. 2021 Mar 11;12:655900. doi: 10.3389/fgene.2021.655900 (PMC7990765; doi:10.3389/fgene.2021.655900)
Supplement: Supplementary Table 2 — Differentially methylated genes (DMGs) and/or differentially expressed genes (DEGs) between adult Chinese alligator gonads in pathways involved in sex maintenance and gonadal function development. [file Table_2.XLSX]

## Sheet: Sheet1
Table S2
Pathway	GeneID	GeneName	Summer			Winter
			Differently expressed	Differently methylated	DMR location	Differently expressed	Differently methylated	DMR location
Oocyte meiosis pathway	Alsi09737	MEK1	Down-regulated	Hyper-methylated	exon,intron,utr5	Down-regulated	Hyper-methylated	exon,intron,utr5,promoter
	Alsi13812	RSK(RPS6KA)	Down-regulated	Hyper-methylated	exon,intron	Down-regulated	Hyper-methylated	exon,intron
	Alsi17513	MAD1L	Down-regulated	Hyper-methylated	exon,intron,promoter	Down-regulated	Hyper-methylated	exon,intron
	Alsi07936	CCNE	Down-regulated	Hyper-methylated	exon,intron	Down-regulated	Hyper-methylated	exon,intron
	Alsi04090	CDC25A	Down-regulated	Hyper-methylated	exon,intron,promoter	Down-regulated	Hyper-methylated	exon,intron,promoter
	Alsi05499	CDC25B	Down-regulated	Hyper-methylated	exon,intron	Down-regulated	Hyper-methylated	exon,intron
	Alsi27137	ITPR1	Down-regulated	Hyper-methylated	exon,intron	Down-regulated	Hyper-methylated	exon,intron
	Alsi20767	ADCY3	Down-regulated	Hyper-methylated	exon,intron	Not DEG	Hyper-methylated	exon,intron
	Alsi08912	NR3C3	Down-regulated	Hyper-methylated	exon,intron	Down-regulated	Hyper-methylated	exon,intron
	Alsi20254	CYCB	Not DEG	Hyper-methylated	exon,intron	Down-regulated	Hyper-methylated	exon,intron
	Alsi21664	CDC2	Not DEG	Hyper-methylated	exon,intron	Not DEG	Hyper-methylated	exon,intron
	Alsi22045	ITPR2-1	Not DEG	Hyper-methylated	exon,intron	Not DEG	Hyper-methylated	exon,intron
	Alsi26015	CPEB1	Not DEG	Hyper-methylated	exon,intron	Up-regulated	Hyper-methylated	exon,intron,promoter
	Alsi14307	CPEB2	Not DEG	Hyper-methylated	exon,intron	Not DEG	Hyper-methylated	exon,intron
	Alsi22052	ITPR2-2	Not DEG	Hyper-methylated	exon,utr3,utr5	Not DEG	Hyper-methylated	exon,utr5
	Alsi05189	SMC1	Not DEG	Hyper-methylated	exon,intron	Not DEG	Hyper-methylated	exon,intron,utr5
	Alsi10642	APC12	Not DEG	Hyper-methylated	exon,intron,promoter	Not DEG	Hyper-methylated	exon,intron,promoter
	Alsi18467	MAD2	Not DEG	Hyper-methylated	exon,intron,promoter	Not DEG	Not DMG	/
	Alsi26352	ADCY7	Not DEG	Hyper-methylated	exon,intron	Not DEG	Not DMG	/
	Alsi25179	YWHAB_Q_Z	Not DEG	Hyper-methylated	exon,intron	Down-regulated	Hyper-methylated	exon,intron,promoter
	Alsi01232	APC13	Not DEG	Hyper-methylated	promoter	Not DEG	Hyper-methylated	promoter
	Alsi06036	APC6	Not DEG	Hyper-methylated	exon,intron,utr5,promoter	Not DEG	Hyper-methylated	exon,intron,utr5,promoter
	Alsi20312	SLK	Not DEG	Hyper-methylated	exon,intron,utr5	Not DEG	Hyper-methylated	exon,intron,utr5,promoter
	Alsi06667	ESP1	Not DEG	Hyper-methylated	exon,utr5	Down-regulated	Hyper-methylated	exon,utr5
	Alsi20521	APC5	Up-regulated	Hyper-methylated	promoter	Up-regulated	Not DMG	/
	Alsi25322	ITPR3	Up-regulated	Hyper-methylated	exon,intron	Up-regulated	Hyper-methylated	exon,intron
	Alsi14434	PLCZ	Up-regulated	Hyper-methylated	exon,utr3	Up-regulated	Hypo/Hper	exon,utr3/exon,intron,utr5,promoter
	Alsi18744	STAG3	Up-regulated	Hyper-methylated	exon,intron	Up-regulated	Hypo/Hper	exon,intron/promoter
	Alsi18870	SMC3	Up-regulated	Hyper-methylated	exon,intron	Up-regulated	Hyper-methylated	exon,intron
	Alsi02207	PLK1	Up-regulated	Hypo/Hyper	exon,intron	Not DEG	Hypo/Hper	exon,intron
	Alsi27471	MOS	Down-regulated	Not DMG	/	Down-regulated	Not DMG	/
	Alsi19197	ERK(MAPK1_3)	Down-regulated	Not DMG	/	Down-regulated	Not DMG	/
	Alsi11825	CCNE	Down-regulated	Not DMG	/	Down-regulated	Not DMG	/
	Alsi05669	YWHAG_H	Down-regulated	Not DMG	/	Down-regulated	Not DMG	/
	Alsi17591	YWHAG_H	Down-regulated	Not DMG	/	Down-regulated	Not DMG	/
	Alsi11431	ADCY4	Down-regulated	Not DMG	/	Not DEG	Hyper-methylated	exon,intron,promoter
	Alsi26954	EMI2	Not DEG	Not DMG	/	Down-regulated	Hper	promoter
	Alsi00930	CDK2	Not DEG	Not DMG	/	Not DEG	Not DMG	/
	Alsi02364	CDC25C	Not DEG	Not DMG	/	Not DEG	Not DMG	/
	Alsi07181	CYCB	Not DEG	Not DMG	/	Down-regulated	Hyper-methylated	exon,intron,utr5,promoter
	Alsi02168	AURKA	Not DEG	Not DMG	/	Not DEG	Not DMG	/
	Alsi09906	RBX1	Not DEG	Not DMG	/	Up-regulated	Not DMG	/
	Alsi02366	APC8	Not DEG	Not DMG	/	Not DEG	Hyper-methylated	promoter
	Alsi03183	PPP2R5	Not DEG	Not DMG	/	Not DEG	Not DMG	/
	Alsi06894	BTRC	Not DEG	Not DMG	/	Down-regulated	Not DMG	/
	Alsi09425	YWHAE	Not DEG	Not DMG	/	Up-regulated	Not DMG	/
	Alsi14334	PTTG	Not DEG	Not DMG	/	Down-regulated	Not DMG	/
	Alsi06466	Myt1	Up-regulated	Not DMG	/	Up-regulated	Not DMG	/
	Alsi23916	BUBL1	Up-regulated	Not DMG	/	Not DEG	Hyper-methylated	exon,utr5
	Alsi00562	CDH1	Up-regulated	Not DMG	/	Not DEG	Hyper-methylated	exon,utr5,promoter
	Alsi23724	CDC20	Up-regulated	Not DMG	/	Not DEG	Not DMG	/
	Alsi19001	CAMK2	Up-regulated	Not DMG	/	Not DEG	Hyper-methylated	exon,intron
	Alsi04473	CALM	Up-regulated	Not DMG	/	Up-regulated	Not DMG	/
	Alsi21166	SGOL1	Up-regulated	Not DMG	/	Up-regulated	Not DMG	/
	Alsi03832	REC8L	Up-regulated	Not DMG	/	Not DEG	Hyper-methylated	exon,intron,utr5
	Alsi24095	SMC1	Up-regulated	Not DMG	/	Up-regulated	Hypo-methylated	exon,intron,utr5
	Alsi01731	SKP1 /SCF	Up-regulated	Not DMG	/	Not DEG	Not DMG	/
Steroid hormone biosynthesis pathway	Alsi15424	CYP3A	Down-regulated	Hyper-methylated	exon,intron	Down-regulated	Hyper-methylated	exon,intron
	Alsi08236	HSD17B12	Not DEG	Hyper-methylated	exon,intron,utr5,promoter	Not DEG	Hyper-methylated	exon,intron,utr5,promoter
	Alsi27290	StAR	Up-regulated	Hyper-methylated	exon,intron,promoter	Not DEG	Not DMG	/
	Alsi01422	CYP11A	Up-regulated	Hyper-methylated	exon,intron,promoter	Down-regulated	Not DMG	/
	Alsi15846	HSD3B	Up-regulated	Hyper-methylated	exon,intron	Up-regulated	Not DMG	/
	Alsi20150	SF1	Up-regulated	Hyper-methylated	exon,intron	Not DEG	Hyper-methylated	exon,intron
	Alsi19455	CYP2C	Up-regulated	Hyper-methylated	exon,intron,utr5	Not DEG	Hyper-methylated	exon,utr5
	Alsi08251	HSD17B4A	Up-regulated	Hyper-methylated	promoter	Not DEG	Hyper-methylated	promoter
	Alsi11309	SULT2B1	Down-regulated	Not DMG	/	Not DEG	Hyper-methylated	exon,intron,promoter
	Alsi23121	HSD17B1	Not DEG	Not DMG	/	Not DEG	Not DMG	/
	Alsi02770	HSD17B2A	Not DEG	Not DMG	/	Not DEG	Not DMG	/
	Alsi02771	HSD17B2B	Not DEG	Not DMG	/	Not DEG	Not DMG	/
	Alsi10378	Cbx2	Not DEG	Not DMG	/	Not DEG	Not DMG	/
	Alsi00944	HSD17B6A	Not DEG	Not DMG	/	Not DEG	Hyper-methylated	promoter
	Alsi00945	HSD17B6B	Not DEG	Not DMG	/	Not DEG	Not DMG	/
	Alsi00946	HSD17B6C	Not DEG	Not DMG	/	Not DEG	Not DMG	/
	Alsi00947	HSD17B6D	Not DEG	Not DMG	/	Not DEG	Not DMG	/
	Alsi11168	HSD17B6E	Not DEG	Not DMG	/	Not DEG	Not DMG	/
	Alsi11172	HSD17B6F	Not DEG	Not DMG	/	Not DEG	Not DMG	/
	Alsi05190	HSD17B10	Not DEG	Not DMG	/	Down-regulated	Hyper-methylated	exon,intron,promoter
	Alsi20333	CYP17A	Up-regulated	Not DMG	/	Up-regulated	Not DMG	/
	Alsi15752	HSD17B4B	Up-regulated	Not DMG	/	Not DEG	Not DMG	/
Female determination/differentiation pathway	Alsi09690	FOG2	Down-regulated	Hyper-methylated	exon,intron	Down-regulated	Hyper-methylated	exon,intron
	Alsi19126	HES1	Down-regulated	Hyper-methylated	exon,intron	Down-regulated	Hyper-methylated	exon,intron
	Alsi05542	BMP2B	Down-regulated	Hyper-methylated	exon,intron	Down-regulated	Not DMG	/
	Alsi12452	FGFR2	Down-regulated	Hyper-methylated	promoter	Not DEG	Hyper-methylated	promoter
	Alsi01197	PDGF-A	Down-regulated	Hyper-methylated	promoter	Down-regulated	Hyper-methylated	exon,intron,promoter
	Alsi18631	PDGFRB	Down-regulated	Hyper-methylated	exon,intron,promoter	Down-regulated	Not DMG	/
	Alsi09259	TGFBR3	Down-regulated	Hyper-methylated	exon,intron	Down-regulated	Hyper-methylated	exon,intron
	Alsi16947	CTNNB1	Down-regulated	Hyper-methylated	promoter	Not DEG	Hyper-methylated	promoter
	Alsi02441	ERα2	Not DEG	Hyper-methylated	exon,intron,promoter	Not DEG	Hyper-methylated	exon,intron,promoter
	Alsi05459	ERβ	Not DEG	Hyper-methylated	exon,intron	Not DEG	Hyper-methylated	exon,intron
	Alsi07458	BMP2C	Not DEG	Hyper-methylated	exon,intron	Not DEG	Not DMG	/
	Alsi08442	TGFβ2B	Not DEG	Hyper-methylated	exon,intron	Not DEG	Hyper-methylated	exon,intron
	Alsi19270	FST	Up-regulated	Hyper-methylated	promoter	Not DEG	Hypo-methylated	exon,intron
	Alsi16145	WT1	Down-regulated	Hypo/Hyper	exon,intron	Down-regulated	Hypo/Hper	exon,intron
	Alsi18186	EMX2	Down-regulated	Hypo-methylated	exon,intron,promoter	Down-regulated	Hypo-methylated	exon,intron,promoter
	Alsi14127	LHX9	Down-regulated	Hypo-methylated	exon,utr5,promoter	Down-regulated	Hper	exon,intron,utr5,promoter
	Alsi24586	GATA2	Not DEG	Hypo-methylated	exon,intron,promoter	Not DEG	Hypo-methylated	exon,intron,promoter
	Alsi04981	GDF9	Down-regulated	Not DMG	/	Down-regulated	Hypo-methylated	promoter
	Alsi15079	WNT5A	Down-regulated	Not DMG	/	Down-regulated	Not DMG	/
	Alsi04737	VNN1	Down-regulated	Not DMG	/	Down-regulated	Not DMG	/
	Alsi00588	BMP2A	Down-regulated	Not DMG	/	Down-regulated	Not DMG	/
	Alsi04812	PDGFRA	Down-regulated	Not DMG	/	Not DEG	Not DMG	/
	Alsi08441	TGFβ2A	Down-regulated	Not DMG	/	Down-regulated	Not DMG	/
	Alsi04067	FOXL2	Not DEG	Not DMG	/	Not DEG	Not DMG	/
	Alsi11157	CYP19A	Not DEG	Not DMG	/	Not DEG	Not DMG	/
	Alsi02440	ERα1	Not DEG	Not DMG	/	Not DEG	Not DMG	/
	Alsi03177	WNT4A	Not DEG	Not DMG	/	Not DEG	Not DMG	/
	Alsi17834	WNT4B	Not DEG	Not DMG	/	Not DEG	Not DMG	/
	Alsi06967	Rspo1	Not DEG	Not DMG	/	Not DEG	Not DMG	/
Female fertility genes	Alsi04546	KiSS-1	Down-regulated	Hyper-methylated	exon,intron	Not DEG	Hyper-methylated	exon,intron
	Alsi14668	ADAMTS1	Down-regulated	Hyper-methylated	exon,intron,utr5	Not DEG	Hyper-methylated	exon,intron,utr5
	Alsi09629	MTNR1A1	Not DEG	Hyper-methylated	exon	Not DEG	Hyper-methylated	exon
	Alsi26176	BNC2A	Not DEG	Hyper-methylated	exon,intron	Not DEG	Hyper-methylated	exon,intron
	Alsi04466	FSHR1	Not DEG	Hyper-methylated	exon,intron,utr5,promoter	Not DEG	Hyper-methylated	exon,intron,utr5,promoter
	Alsi08086	PRLRB	Not DEG	Hyper-methylated	exon,intron,promoter	Not DEG	Hyper-methylated	exon,intron,promoter
	Alsi09727	GnRHR2A	Not DEG	Hyper-methylated	exon,utr5	Not DEG	Not DMG	/
	Alsi22688	GnRHR2C	Not DEG	Hyper-methylated	exon,utr5	Not DEG	Hyper-methylated	exon,utr5
	Alsi18123	BMPR-1B	Not DEG	Hyper-methylated	exon,intron	Down-regulated	Hyper-methylated	exon,intron
	Alsi18354	PRLR	Not DEG	Hyper-methylated	exon,intron	Not DEG	Hyper-methylated	exon,intron
	Alsi18184	nanos1	Down-regulated	Not DMG	/	Down-regulated	Not DMG	/
	Alsi20255	BMP15	Down-regulated	Not DMG	/	Not DEG	Not DMG	/
	Alsi04020	GPR54	Not DEG	Not DMG	/	Not DEG	Not DMG	/
	Alsi17213	RIP140、NRIP1	Not DEG	Not DMG	/	Down-regulated	Not DMG	/
	Alsi17022	RBP4	Not DEG	Not DMG	/	Not DEG	Not DMG	/
	Alsi04467	FSHR2	Not DEG	Not DMG	/	Not DEG	Not DMG	/
	Alsi07542	FSH-β	Not DEG	Not DMG	/	Not DEG	Not DMG	/
	Alsi15583	GnRHR2B	Not DEG	Not DMG	/	Not DEG	Not DMG	/
	Alsi19825	MTNR1B	Not DEG	Not DMG	/	Down-regulated	Not DMG	/
	Alsi22940	BMP6	Not DEG	Not DMG	/	Not DEG	Not DMG	/
	Alsi26177	Basonuclin-2B	Not DEG	Not DMG	/	Not DEG	Not DMG	/
	Alsi18221	MTNR1A2	Up-regulated	Not DMG	/	Not DEG	Not DMG	/
Male determination/differentiation pathway	Alsi21317	FGFR2B	Down-regulated	Hyper-methylated	exon,intron	Not DEG	Hyper-methylated	exon,intron
	Alsi02672	PDGF1	Down-regulated	Hyper-methylated	exon,utr5	Not DEG	Hyper-methylated	exon,utr5,promoter
	Alsi22609	PDGFA3	Down-regulated	Hyper-methylated	exon,utr5,promoter	Not DEG	Hyper-methylated	exon,utr5,promoter
	Alsi20201	PDGF3	Down-regulated	Hyper-methylated	exon,intron,utr5,promoter	Down-regulated	Hyper-methylated	exon,intron,utr5,promoter
	Alsi03065	PDGFC1	Down-regulated	Hyper-methylated	exon,intron	Not DEG	Hyper-methylated	exon,intron
	Alsi21532	GADD45G	Down-regulated	Hyper-methylated	promoter	Down-regulated	Hyper-methylated	promoter
	Alsi09175	PDGF2	Not DEG	Hyper-methylated	exon,intron,promoter	Not DEG	Hyper-methylated	exon,intron,promoter
	Alsi15507	DAX2	Not DEG	Hyper-methylated	exon,promoter	Not DEG	Not DMG	/
	Alsi10845	PTCH1	Not DEG	Hyper-methylated	exon,intron	Not DEG	Hyper-methylated	exon,intron,promoter
	Alsi27297	FGFR1	Not DEG	Hyper-methylated	exon,intron,promoter	Up-regulated	Hyper-methylated	exon,intron,promoter
	Alsi02300	SMAD4A	Not DEG	Hyper-methylated	exon,intron	Not DEG	Hyper-methylated	exon,intron
	Alsi04057	SIX1A	Not DEG	Hyper-methylated	exon,intron,promoter	Not DEG	Hyper-methylated	exon,utr5,promoter
	Alsi24145	AR	Not DEG	Hyper-methylated	exon,intron	Not DEG	Hyper-methylated	exon,intron
	Alsi15171	GATA4	Not DEG	Hyper-methylated	exon,intron,promoter	Not DEG	Hyper-methylated	exon,intron,promoter
	Alsi02166	CBLN4	Not DEG	Hyper-methylated	exon,intron,promoter	Not DEG	Hyper-methylated	exon,intron
	Alsi03066	PDGFC2	Not DEG	Hyper-methylated	exon,intron	Not DEG	Hyper-methylated	exon,intron
	Alsi20694	HHAT	Not DEG	Hyper-methylated	exon,intron	Not DEG	Not DMG	/
	Alsi21323	KDM3A/JMJD1A	Not DEG	Hyper-methylated	exon,intron,utr5,promoter	Not DEG	Hyper-methylated	exon,intron,utr5,promoter
	Alsi12948	DMRT1	Up-regulated	Hyper-methylated	exon,intron	Up-regulated	Hyper-methylated	exon,intron
	Alsi12198	SOX9	Up-regulated	Hyper-methylated	exon,intron,promoter	Not DEG	Hyper-methylated	exon,intron,promoter
	Alsi09101	AMH	Up-regulated	Hyper-methylated	exon,intron	Up-regulated	Hyper-methylated	exon,intron
	Alsi03214	MAP3K1	Up-regulated	Hyper-methylated	exon,intron,utr5	Up-regulated	Hyper-methylated	exon,intron,utr5
	Alsi21820	MAP3K4	Up-regulated	Hyper-methylated	exon,intron	Not DEG	Not DMG	/
	Alsi03750	SOX8	Not DEG	Hypo/Hyper	exon,intron	Not DEG	Hypo/Hper	exon,intron
	Alsi09917	PDGFB	Not DEG	Hypo-methylated	exon,intron	Not DEG	Not DMG	/
	Alsi04483	SIX1B	Not DEG	Hypo-methylated	exon,intron	Not DEG	Hypo-methylated	exon,intron
	Alsi07043	SOX3	Not DEG	Hypo-methylated	promoter	Down-regulated	Hypo-methylated	promoter
	Alsi06201	SMAD2	Not DEG	Not DMG	/	Not DEG	Not DMG	/
	Alsi06593	SIX4	Not DEG	Not DMG	/	Not DEG	Not DMG	/
	Alsi04738	VNN1B	Not DEG	Not DMG	/	Not DEG	Not DMG	/
	Alsi09946	SOX10	Not DEG	Not DMG	/	Not DEG	Not DMG	/
	Alsi11147	SMAD4B	Not DEG	Not DMG	/	Not DEG	Not DMG	/
	Alsi17590	SIX1C	Not DEG	Not DMG	/	Not DEG	Not DMG	/
	Alsi18674	PDGFRB2	Not DEG	Not DMG	/	Not DEG	Not DMG	/
	Alsi20609	PDGFA2	Not DEG	Not DMG	/	Not DEG	Not DMG	/
	Alsi25321	FGF9	Up-regulated	Not DMG	/	Up-regulated	Not DMG	/
	Alsi09061	HPGDS	Up-regulated	Not DMG	/	Up-regulated	Not DMG	/
